# Supplementary material for: Introducing micropores into carbon nanoparticles synthesized via a solution plasma process by thermal treatment and their charge storage properties in supercapacitors
Source: Royal Society of Chemistry journal article supplement (doi:10.1039/d3ra02314a), 2023-01-01
Supplement: d3ra02314a1.pdf [file d3ra02314a1.pdf]

## Supporting Information

### **Introducing micropores into carbon nanoparticles synthesized via solution plasma process by thermal treatment and their charge storage properties in supercapacitors**

Myo Myo Thu<sup>a,b</sup>, Nattapat Chaiammart<sup>a</sup>, Oratai Jongprateep,<sup>a,b</sup> Ratchatee  
Techapiesancharoenkij,<sup>a,b</sup> Aye Aye Thant<sup>c</sup>, Nagahiro Saito<sup>d</sup> and Gasidit Panomsuwan<sup>a,b,\*</sup>

<sup>a</sup> Department of Materials Engineering, Faculty of Engineering, Kasetsart University, Bangkok  
10900, Thailand

<sup>b</sup> ICE-Matter Consortium, ASEAN University Network/Southeast Asia Engineering Education  
Development Network (AUN/SEED-Net), Kasetsart University, Bangkok 10900, Thailand

<sup>c</sup> Department of Physics, Faculty of Science, University of Yangon, Yangon 11041, Myanmar

<sup>d</sup> Department of Chemical Systems Engineering, Graduate School of Engineering, Nagoya  
University, Nagoya 464-8603, Japan

*\*Email: gasidit.p@ku.ac.th*

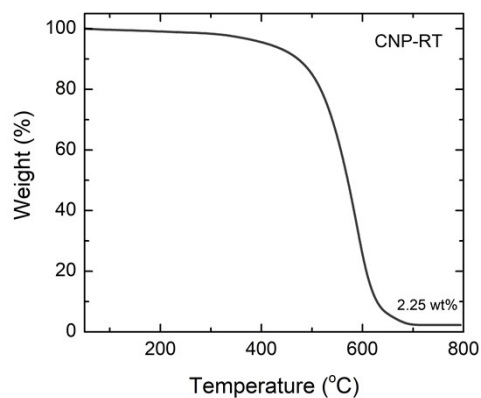

**Fig. S1.** TGA curve of CNP-RT in the temperature range of 50 to 800 °C at a heating rate of 10 °C min<sup>-1</sup> and under O<sub>2</sub> flow.

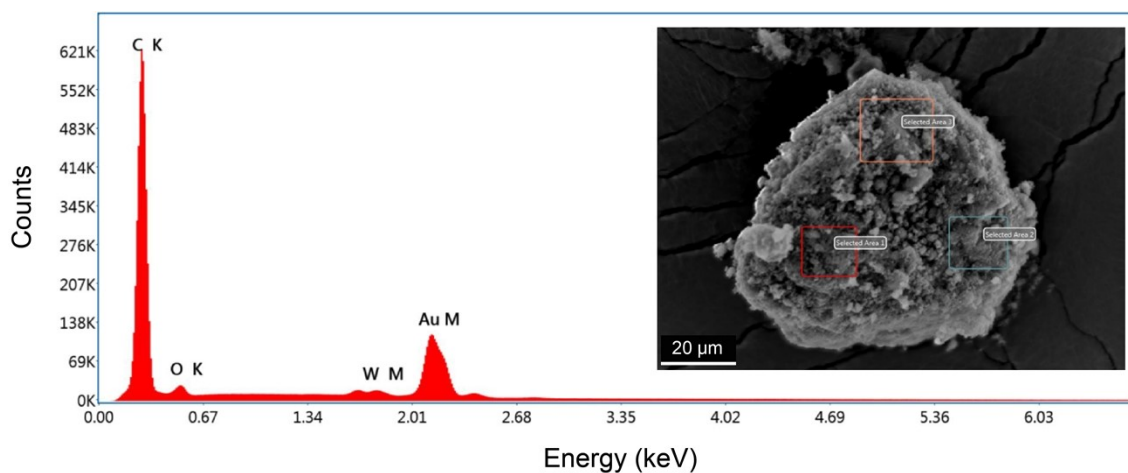

**Fig. S2.** EDS area analysis on three different areas of CNP-RT. The Au M signal was also detected due to the Au coating on the sample before measurements.

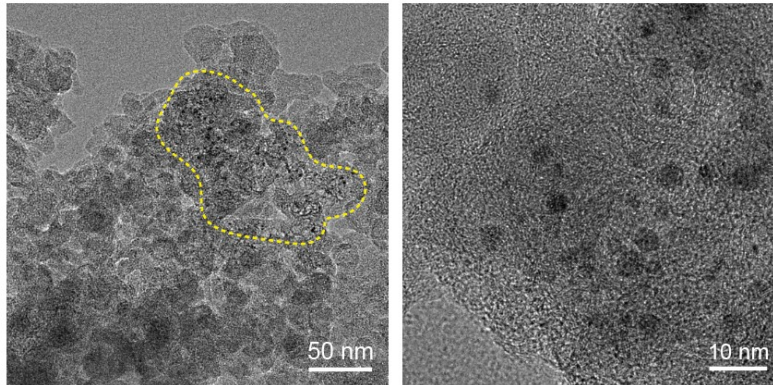

**Fig. S3.** TEM images of CNP-RT showing the presence of  $WC_{1-x}$  particles encapsulated in carbon particles.

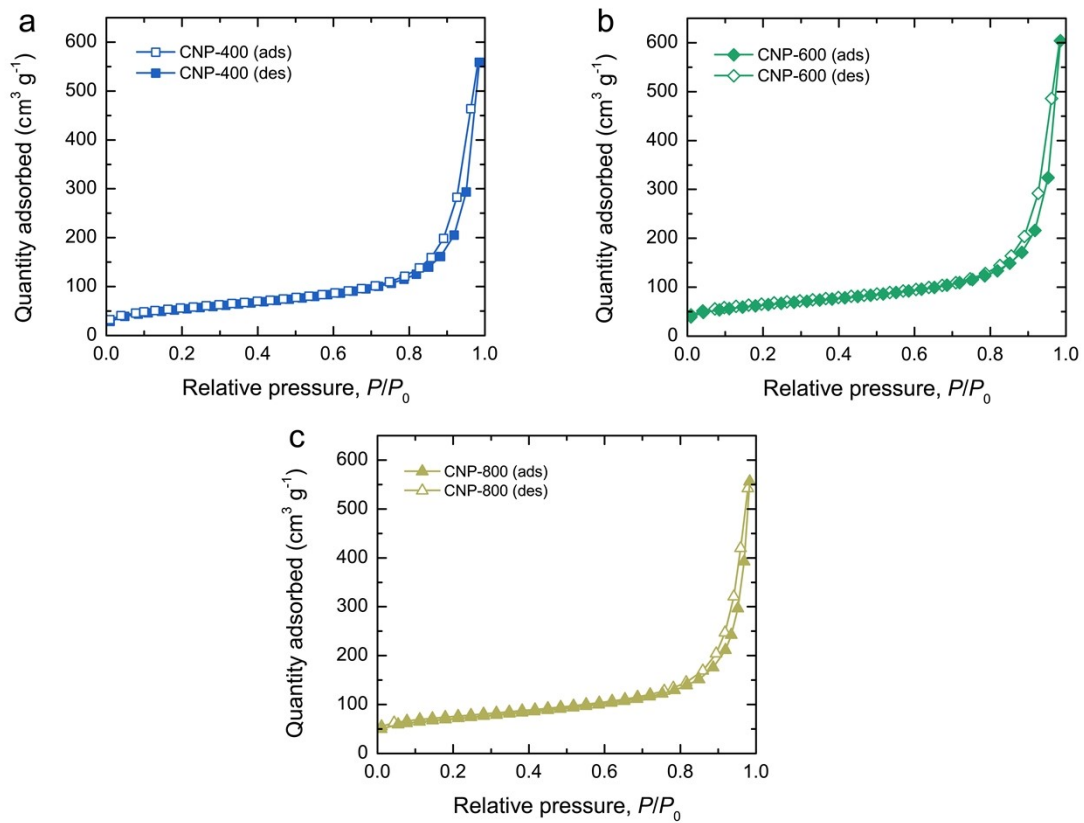

**Fig. S4.**  $N_2$  adsorption-desorption isotherm of: (a) CNP-400, (b) CNP-600, and (c) CNP-800.

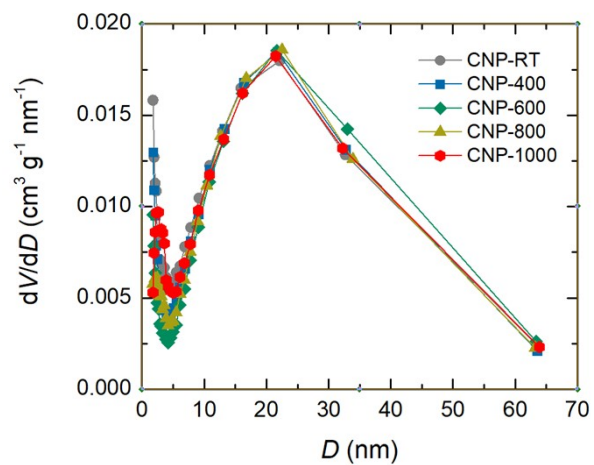

**Fig. S5.** BJH pore size distribution obtained from desorption isotherm of CNPs.

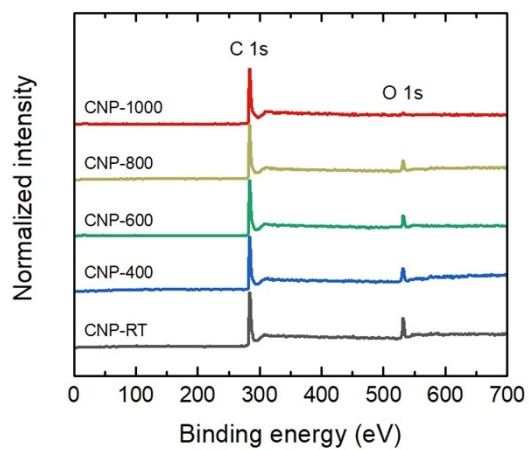

**Fig. S6.** XPS survey spectra of CNPs.

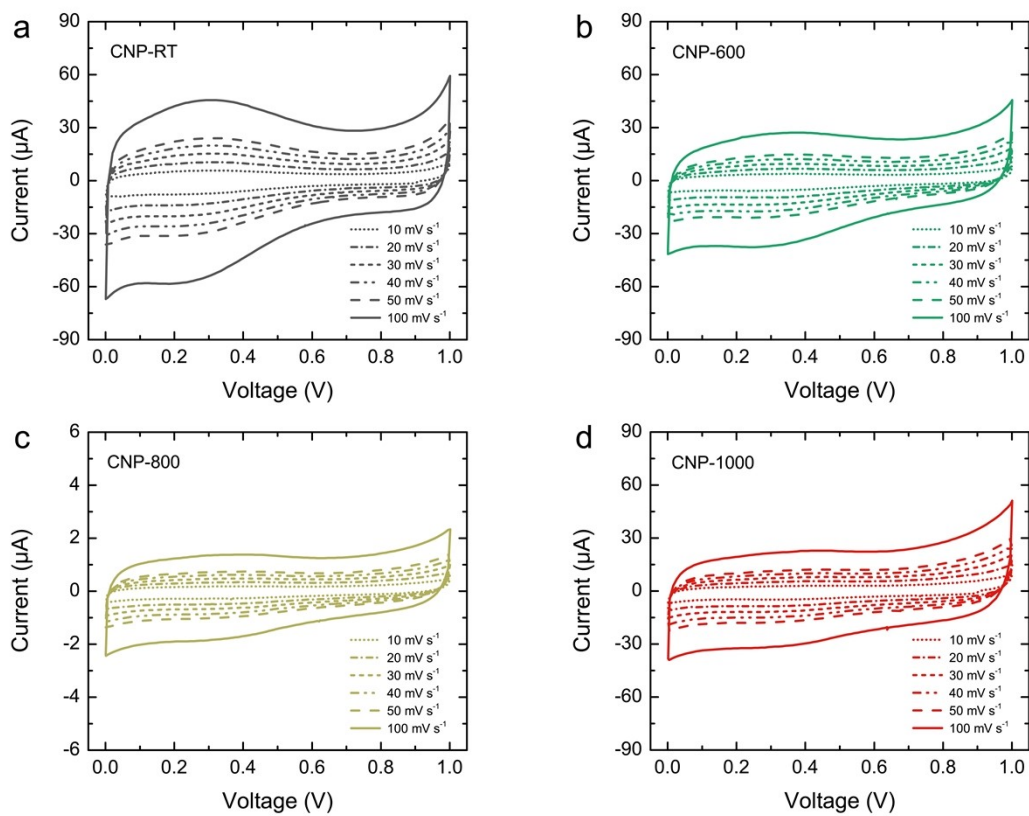

**Fig. S7.** CV curves at different scan rates from 10 to 100  $\text{mV s}^{-1}$ : (a) CNP-RT, (b) CNP-600, (c) CNP-800, and (d) CNP-1000.

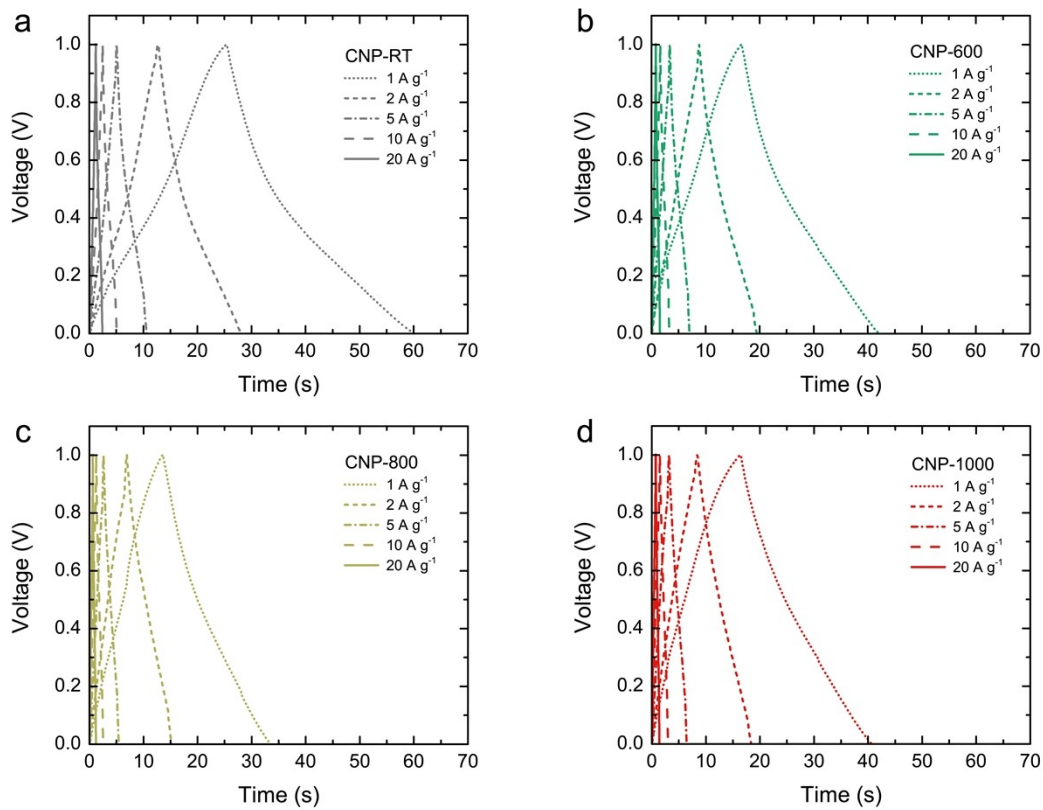

**Fig. S8.** GCD curves at different current densities from 1 to 20 A g<sup>-1</sup>: (a) CNP-RT, (b) CNP-600, (c) CNP-800, and (d) CNP-1000.
